# Supplementary material for: Controllable synthesis of coralloid Fe3O4 nanoclusters in an ionic liquid for catalytic applications
Source: Royal Society of Chemistry journal article supplement (doi:10.1039/c5ce02095f), 2015-12-21
Supplement: c5ce02095f1.pdf [file c5ce02095f1.pdf]

## Supporting Information

# Controllable synthesis of coralloid Fe<sub>3</sub>O<sub>4</sub> nanoclusters in an ionic liquid for catalytic applications

*Kai Sun*<sup>a</sup>, *Changgeng Sun*<sup>a</sup>, *Shaokun Tang*<sup>\*a,b</sup>

<sup>a</sup> Key Laboratory for Green Chemical Technology of Ministry of Education, School of Chemical Engineering & Technology, Tianjin University, Tianjin 300072, China

<sup>b</sup> Collaborative Innovation Center of Chemical Science and Engineering (Tianjin), Tianjin University, Tianjin 300072, China

E-mail address: [shktang@tju.edu.cn](mailto:shktang@tju.edu.cn)

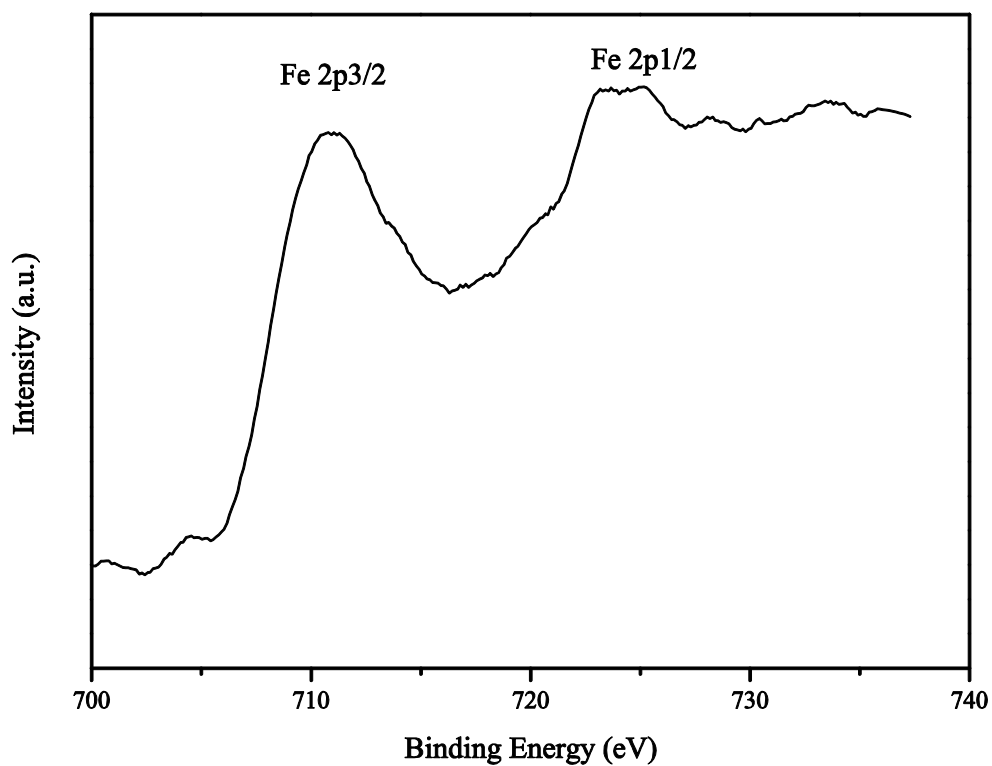

**Figure S1.** XPS spectrum of the coralloid  $\text{Fe}_3\text{O}_4$  nanolusters synthesized in the presence of [Dmim]Cl

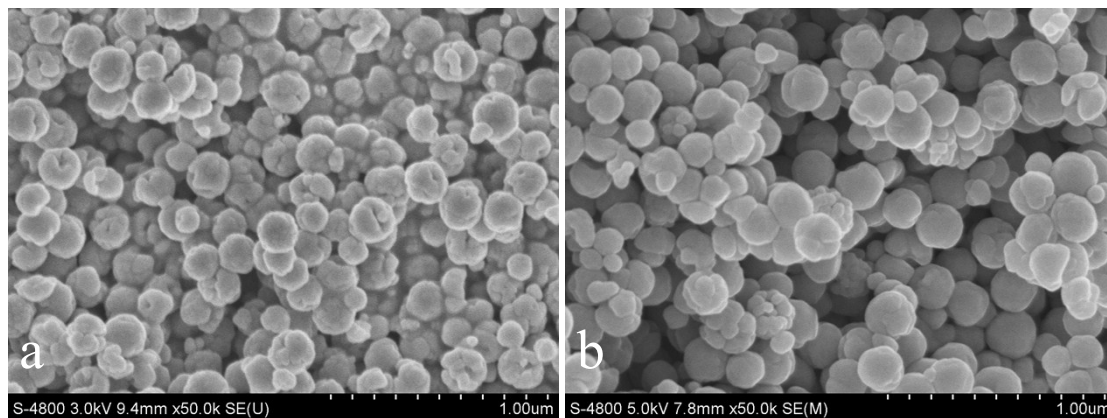

**Figure S2.** SEM images of  $\text{Fe}_3\text{O}_4$  nanoparticles synthesized using precursor ferric chloride in the absence of [Dmim]Cl (a) and in the presence of [Dmim]Cl(b).

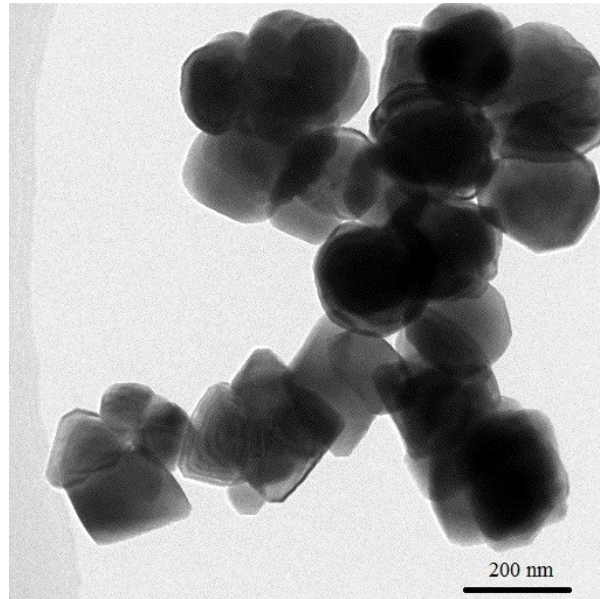

**Figure S3.** TEM image of commercial  $\text{Fe}_3\text{O}_4$
